# Supplementary material for: Signals of Potential Species Associations Offer Clues about Community Organisation of Stream Fish across Seasons
Source: MDPI journal article supplement (doi:10.3390/ani12131721), 2022-07-03
Supplement: s1 [file s1]

**Table S1.** Abbreviation and feeding habits of the fish species in the Qiupu River

| Species                            | Abbreviation        | Feeding habits |
|------------------------------------|---------------------|----------------|
| <i>Acheilognathus barbatulus</i>   | A. barbatulus       | planktivore    |
| <i>Acheilognathus chankaensis</i>  | A. chankaensis      | planktivore    |
| <i>Acrossocheilus fasciatus</i>    | A. fasciatus        | planktivore    |
| <i>Aristichthys nobilis</i>        | A. nobilis          | planktivore    |
| <i>Abbottina rivularis</i>         | A. rivularis        | benthivore     |
| <i>Acheilognathus taenianalis</i>  | A. taenianalis      | planktivore    |
| <i>Culter alburnus</i>             | C. alburnus         | piscivore      |
| <i>Carassius auratus</i>           | C. auratus          | omnivore       |
| <i>Cyprinus carpio</i>             | C. carpio           | omnivore       |
| <i>Cultrichthys erythropterus</i>  | C. erythropterus    | piscivore      |
| <i>Culter mongolicus</i>           | C. mongolicus       | piscivore      |
| <i>Coilia nasus</i>                | C. nasus            | omnivore       |
| <i>Cobitis rarus</i>               | C. rarus            | benthivore     |
| <i>Culter dabryi</i>               | C. dabryi           | piscivore      |
| <i>Hemibarbus labeo</i>            | H. labeo            | benthivore     |
| <i>Hemiculter leucisculus</i>      | H. leucisculus      | omnivore       |
| <i>Hypophthalmichthys molitrix</i> | H. molitrix         | planktivore    |
| <i>Leptobotia guilinensis</i>      | L. guilinensis      | omnivore       |
| <i>Liobagrus styani</i>            | L. styani           | omnivore       |
| <i>Pelteobagrus vachelli</i>       | P. vachelli         | benthivore     |
| <i>Misgurnus anguillicaudatus</i>  | M. anguillicaudatus | omnivore       |
| <i>Macropodus chinensis</i>        | M. chinensis        | planktivore    |
| <i>Microphysogobio fukiensis</i>   | M. fukiensis        | benthivore     |
| <i>Mylopharyngodon piceus</i>      | M. piceus           | benthivore     |
| <i>Megalobrama skolkovii</i>       | M. skolkovii        | omnivore       |
| <i>Micropercops swinhonis</i>      | M. swinhonis        | omnivore       |
| <i>Opsariichthys bidens</i>        | O. bidens           | omnivore       |
| <i>Odontobutis obscurus</i>        | O. obscurus         | piscivore      |
| <i>Paramisgurnus dabryanus</i>     | P. dabryanus        | omnivore       |
| <i>Pseudohemiculter dispar</i>     | P. dispar           | omnivore       |
| <i>Pseudorasbora elongata</i>      | P. elongata         | planktivore    |
| <i>Pelteobagrus fulvidraco</i>     | P. fulvidraco       | benthivore     |
| <i>Pelteobagrus nitidus</i>        | P. nitidus          | benthivore     |
| <i>Phoxinus oxycephalus</i>        | P. oxycephalus      | benthivore     |
| <i>Pseudorasbora parva</i>         | P. parva            | benthivore     |
| <i>Pseudobrama simoni</i>          | P. simoni           | planktivore    |
| <i>Pseudobagrus truncatus</i>      | P. truncatus        | benthivore     |
| <i>Rhinogobius giurinus</i>        | R. giurinus         | omnivore       |
| <i>Squalidus argentatus</i>        | S. argentatus       | benthivore     |
| <i>Silurus asotus</i>              | S. asotus           | piscivore      |
| <i>Siniperca chuatsi</i>           | S. chuatsi          | piscivore      |

| <b>Species</b>                       | <b>Abbreviation</b> | <b>Feeding habits</b> |
|--------------------------------------|---------------------|-----------------------|
| <i>Saurogobio dabryi</i>             | S. dabryi           | benthivore            |
| <i>Sarcocheilichthys nigripinnis</i> | S. nigripinnis      | benthivore            |
| <i>Squalidus nitens</i>              | S. nitens           | benthivore            |
| <i>Sarcocheilichthys parvus</i>      | S. parvus           | benthivore            |
| <i>Siniperca scherzeri</i>           | S. scherzeri        | piscivore             |
| <i>Sarcocheilichthys sinensis</i>    | Sa. sinensis        | omnivore              |
| <i>Sinobdella sinensis</i>           | Si. sinensis        | omnivore              |
| <i>Hemiculter bleekeri</i>           | H. bleekeri         | omnivore              |
| <i>Vanmanenia stenosoma</i>          | V. stenosoma        | benthivore            |
| <i>Xenocypris argentea</i>           | X. argentea         | planktivore           |
| <i>Xenocypris microlepis</i>         | X. microlepis       | planktivore           |
| <i>Zacco platypus</i>                | Z. platypus         | omnivore              |

**Table S2.** Fish richness and abundance for the three stream orders in the dry and wet seasons of the Qiupu River

|                   | <b>Second_order</b> | <b>Third_order</b> | <b>Fourth_order</b> |
|-------------------|---------------------|--------------------|---------------------|
| <b>Dry season</b> |                     |                    |                     |
| Fish richness     | 14                  | 21                 | 26                  |
| Fish abundance    | 548                 | 171                | 130                 |
| <b>Wet season</b> |                     |                    |                     |
| Fish richness     | 18                  | 25                 | 31                  |
| Fish abundance    | 301                 | 51                 | 327                 |

**Table S3.** Average values and ranges of the environmental covariates for the three stream orders in the wet season of the Qiupu River

| Environmental factors   | Second_order |        |        | Third_order |        |        | Fourth_order |        |        |
|-------------------------|--------------|--------|--------|-------------|--------|--------|--------------|--------|--------|
|                         | Max          | Min    | Ave    | Max         | Min    | Ave    | Max          | Min    | Ave    |
| Elevation (m)           | 132.00       | 59.00  | 87.75  | 52.00       | 5.00   | 31.00  | 5.00         | 0.00   | 1.63   |
| Dissolved oxygen (mg/L) | 8.38         | 5.40   | 6.85   | 4.79        | 19.47  | 11.16  | 17.74        | 9.19   | 12.44  |
| Water temperature (°C)  | 24.50        | 21.20  | 22.98  | 24.00       | 22.20  | 23.28  | 26.60        | 23.10  | 24.90  |
| Conductivity (μs/cm)    | 253.40       | 203.40 | 232.99 | 172.10      | 271.40 | 209.80 | 213.60       | 199.80 | 207.61 |
| Stream width (m)        | 81.40        | 21.30  | 62.19  | 157.00      | 93.00  | 113.93 | 214.00       | 130.00 | 166.63 |
| Water depth (m)         | 71.00        | 20.00  | 47.63  | 150.00      | 50.00  | 85.00  | 210.00       | 80.00  | 150.00 |
| Current velocity (m/s)  | 1.50         | 0.10   | 0.70   | 0.50        | 0.00   | 0.25   | 0.50         | 0.20   | 0.38   |
| Boulder (%)             | 40.00        | 0.00   | 7.50   | 0.00        | 0.00   | 0.00   | 0.00         | 0.00   | 0.00   |
| Cobble (%)              | 30.00        | 0.00   | 8.75   | 20.00       | 0.00   | 12.50  | 0.00         | 0.00   | 0.00   |
| Pebble (%)              | 40.00        | 0.00   | 25.00  | 40.00       | 10.00  | 25.00  | 30.00        | 0.00   | 6.25   |
| Gravel (%)              | 70.00        | 0.00   | 37.50  | 50.00       | 20.00  | 30.00  | 60.00        | 40.00  | 48.75  |
| Sand (%)                | 60.00        | 0.00   | 21.25  | 40.00       | 20.00  | 32.50  | 60.00        | 20.00  | 45.00  |
| Forest (%)              | 0.99         | 0.39   | 0.66   | 0.87        | 0.01   | 0.48   | 0.24         | 0.00   | 0.10   |
| Grassland (%)           | 0.41         | 0.00   | 0.12   | 0.56        | 0.00   | 0.17   | 0.42         | 0.00   | 0.08   |
| Urban (%)               | 0.01         | 0.00   | 0.00   | 0.00        | 0.00   | 0.00   | 0.01         | 0.00   | 0.00   |
| Agriculture (%)         | 0.44         | 0.00   | 0.22   | 0.46        | 0.12   | 0.36   | 1.00         | 0.33   | 0.80   |
| Waterbodies (%)         | 0.00         | 0.00   | 0.00   | 0.00        | 0.00   | 0.00   | 0.07         | 0.00   | 0.02   |

**Table S4.** Average values and ranges of the environmental covariates for the three stream orders in the dry season of the Qiupu River

| Environmental factors   | Second_order |        |        | Third_order |        |        | Fourth_order |        |        |
|-------------------------|--------------|--------|--------|-------------|--------|--------|--------------|--------|--------|
|                         | Max          | Min    | Ave    | Max         | Min    | Ave    | Max          | Min    | Ave    |
| Elevation (m)           | 122.00       | 54.00  | 87.25  | 28.00       | 5.00   | 14.50  | 5.00         | 0.00   | 1.63   |
| Dissolved oxygen (mg/L) | 11.75        | 6.92   | 8.64   | 11.21       | 9.34   | 10.29  | 8.00         | 5.87   | 6.74   |
| Water temperature (°C)  | 12.10        | 7.40   | 10.68  | 13.40       | 10.10  | 12.03  | 13.70        | 10.20  | 11.04  |
| Conductivity (µs/cm)    | 254.80       | 129.90 | 198.58 | 297.60      | 176.40 | 259.60 | 335.30       | 275.10 | 299.00 |
| Stream width (m)        | 41.00        | 20.00  | 29.88  | 59.00       | 30.00  | 48.00  | 66.00        | 41.00  | 52.88  |
| Water depth (m)         | 66.00        | 26.00  | 38.25  | 100.00      | 60.00  | 59.75  | 120.00       | 55.00  | 86.25  |
| Current velocity (m/s)  | 0.30         | 0.10   | 0.14   | 0.40        | 0.00   | 0.20   | 0.50         | 0.30   | 0.41   |
| Boulder (%)             | 0.40         | 0.00   | 0.08   | 0.00        | 0.00   | 0.00   | 0.00         | 0.00   | 0.00   |
| Cobble (%)              | 0.30         | 0.00   | 0.09   | 0.20        | 0.00   | 0.13   | 0.00         | 0.00   | 0.00   |
| Pebble (%)              | 0.40         | 0.00   | 0.25   | 0.40        | 0.10   | 0.25   | 0.30         | 0.10   | 0.06   |
| Gravel (%)              | 0.70         | 0.00   | 0.38   | 0.50        | 0.20   | 0.30   | 0.60         | 0.40   | 0.49   |
| Sand (%)                | 0.60         | 0.00   | 0.21   | 0.40        | 0.20   | 0.33   | 0.60         | 0.20   | 0.45   |
| Forest (%)              | 0.99         | 0.39   | 0.66   | 0.88        | 0.01   | 0.48   | 0.24         | 0.00   | 0.10   |
| Grassland (%)           | 0.41         | 0.00   | 0.12   | 0.56        | 0.00   | 0.17   | 0.42         | 0.00   | 0.08   |
| Urban (%)               | 0.01         | 0.00   | 0.00   | 0.00        | 0.00   | 0.00   | 0.01         | 0.00   | 0.00   |
| Agriculture (%)         | 0.44         | 0.00   | 0.22   | 0.47        | 0.12   | 0.36   | 1.00         | 0.33   | 0.80   |
| Waterbodies (%)         | 0.00         | 0.00   | 0.00   | 0.00        | 0.00   | 0.00   | 0.07         | 0.00   | 0.02   |

**Table S5.** Model fit diagnostics and prediction errors for each Poisson log–normal (PLN) models in dry season.

| <b>Model</b>             | <b>BIC</b>          | <b>RMSE</b> | <b>BIC</b>         | <b>RMSE</b> | <b>BIC</b>          | <b>RMSE</b> |
|--------------------------|---------------------|-------------|--------------------|-------------|---------------------|-------------|
| <b>Dry season</b>        | <b>Second–order</b> |             | <b>Third–order</b> |             | <b>Fourth–order</b> |             |
| Site                     | -268.8442           | 0.5791385   | -263.1233          | 0.2006302   | -557.0691           | 0.3389599   |
| Site + Elevation         | -267.7142           | 0.5671455   | -256.4282          | 0.2353072   | -566.0555           | 0.3630749   |
| Site + Dissolved oxygen  | -272.9281           | 0.5993287   | -264.8085          | 0.1634944   | -572.1259           | 0.2911683   |
| Site + Water temperature | -275.0192           | 0.7513443   | -271.4026          | 0.4297821   | -579.9218           | 0.3001027   |
| Site + Conductivity      | -361.3449           | 1.3954962   | -306.2135          | 0.8645403   | -633.7147           | 0.5754614   |
| Site + Stream width      | -276.2094           | 0.5734773   | -304.7802          | 0.9764922   | -632.0535           | 0.5670329   |
| Site + Water depth       | -273.2998           | 0.7123752   | -300.6710          | 0.9423611   | -636.8832           | 0.6394525   |
| Site + Current velocity  | -276.4271           | 0.6066771   | /                  | /           | /                   | /           |
| Site + Boulder           | -271.9447           | 0.6105734   | -266.5269          | 0.2675446   | /                   | /           |
| Site + Cobble            | -270.5493           | 0.6821490   | -261.6769          | 0.1999360   | -583.8409           | 0.3193222   |
| Site + Pebble            | -273.2037           | 0.6334642   | -265.4749          | 0.1974774   | -580.7233           | 0.3027647   |
| Site + Gravel            | -294.2110           | 0.6603473   | -265.1395          | 0.1949509   | -578.0253           | 0.3556943   |
| Site + Sand              | -269.4481           | 0.7600104   | -268.4440          | 0.2737420   | -585.0260           | 0.3107738   |

**Table S6.** Model fit diagnostics and prediction errors for each Poisson log-normal (PLN) models in wet season.

| <b>Model</b>             | <b>BIC</b>          | <b>RMSE</b> | <b>BIC</b>         | <b>RMSE</b> | <b>BIC</b>          | <b>RMSE</b> |
|--------------------------|---------------------|-------------|--------------------|-------------|---------------------|-------------|
| <b>Wet season</b>        | <b>Second-order</b> |             | <b>Third-order</b> |             | <b>Fourth-order</b> |             |
| Site                     | -379.2315           | 0.6155388   | -323.5700          | 0.11084218  | -825.6100           | 0.3049280   |
| Site + Elevation         | -424.2716           | 0.7086136   | -336.1901          | 0.19277331  | -828.2203           | 0.4026995   |
| Site + Dissolved oxygen  | -385.0173           | 0.4874386   | -337.2866          | 0.18944651  | -820.5501           | 0.2530538   |
| Site + Water temperature | -393.5658           | 0.6282974   | -338.9942          | 0.25709896  | -850.2098           | 0.3802063   |
| Site + Conductivity      | -440.8542           | 0.6392205   | -351.3117          | 0.54155741  | -905.6762           | 0.7244338   |
| Site + Stream width      | -430.1546           | 0.6645610   | -328.8042          | 0.12907598  | -907.9380           | 0.7077361   |
| Site + Water depth       | -390.7146           | 0.6672273   | -331.6417          | 0.09927637  | -903.4869           | 0.6838925   |
| Site + Current velocity  | -388.4087           | 0.5969755   | -330.6973          | 0.03219890  | /                   | /           |
| Site + Boulder           | -387.7962           | 0.6576995   | -331.6027          | 0.05263872  | /                   | /           |
| Site + Cobble            | -389.2447           | 0.5959866   | -332.4193          | 0.08411214  | -841.6615           | 0.2958145   |
| Site + Pebble            | -386.3100           | 0.5957144   | /                  | /           | -840.5596           | 0.3267319   |
| Site + Gravel            | -390.4531           | 0.5676425   | -331.7339          | 0.08035994  | -846.2166           | 0.3488692   |
| Site + Sand              | -386.1569           | 0.5398407   | -331.8530          | 0.12287592  | -845.3906           | 0.3303147   |

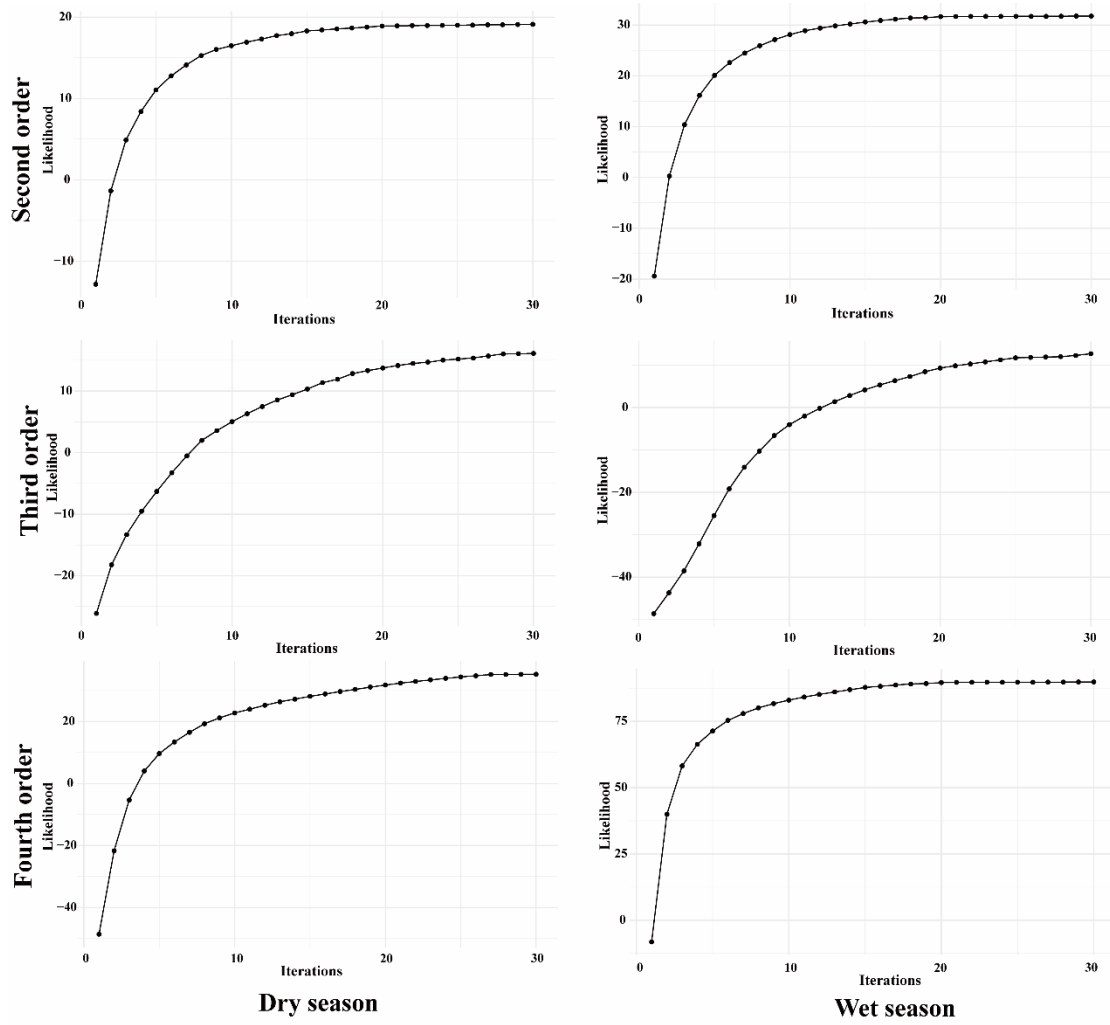

**Figure S1.** Plots of likelihood fitted curve of each network
